# Supplementary material
Source: publisher site journal article supplement (https://www.degruyter.com/publication/isbn/9783110351101/downloadAsset/9783110351101_Content.pdf)
Supplement: Supplementary file 1 [file 9783110351101_Content.pdf]

# Contents

## List of Works of Ludwig Wittgenstein — 2

Andrew Lugg

**When and why was Remarks on Colour written – and why is it important to know? — 1**

Joachim Schulte

**“We Have a Colour System as We Have a Number System” — 21**

Richard Heinrich

**Green and Orange – Colour and Space in Wittgenstein — 33**

Gabriele M. Mras

**‘Propositions About Blue’ – Wittgenstein on the Concept of Colour — 45**

Gary Kemp

**Did Wittgenstein have a Theory of Colour? — 57**

Frederik A. Gierlinger

**“Imagine a Tribe of Colour-Blind People” — 67**

Herbert Hrachovec

**Reddish Green — 79**

Martin Kusch

**Wittgenstein as a Commentator on the Psychology and Anthropology of Colour — 93**

Barry Stroud

**Concepts of Colour and Limits of Understanding — 109**

**Notes on the Contributors — 119**

**Index — 122**

**Names — 124**
